# Supplementary material for: Mutational analysis of the 5′-OH oligonucleotide phosphate acceptor site of T4 polynucleotide kinase
Source: PubMed Central journal article supplement — Nucleic Acids Res. 2009 Dec 4;38(4):1304–11. doi: 10.1093/nar/gkp1096 (PMC2831316; doi:10.1093/nar/gkp1096), 2009-12-04
Supplement: gkp1096_1.pdf [file gkp1096_1.pdf]

Supplemental Material

**Mutational analysis of the 5'-OH oligonucleotide phosphate acceptor site of T4 polynucleotide kinase**

Li Kai Wang and Stewart Shuman

Molecular Biology Program, Sloan-Kettering Institute, New York, NY 10021

Figure S1

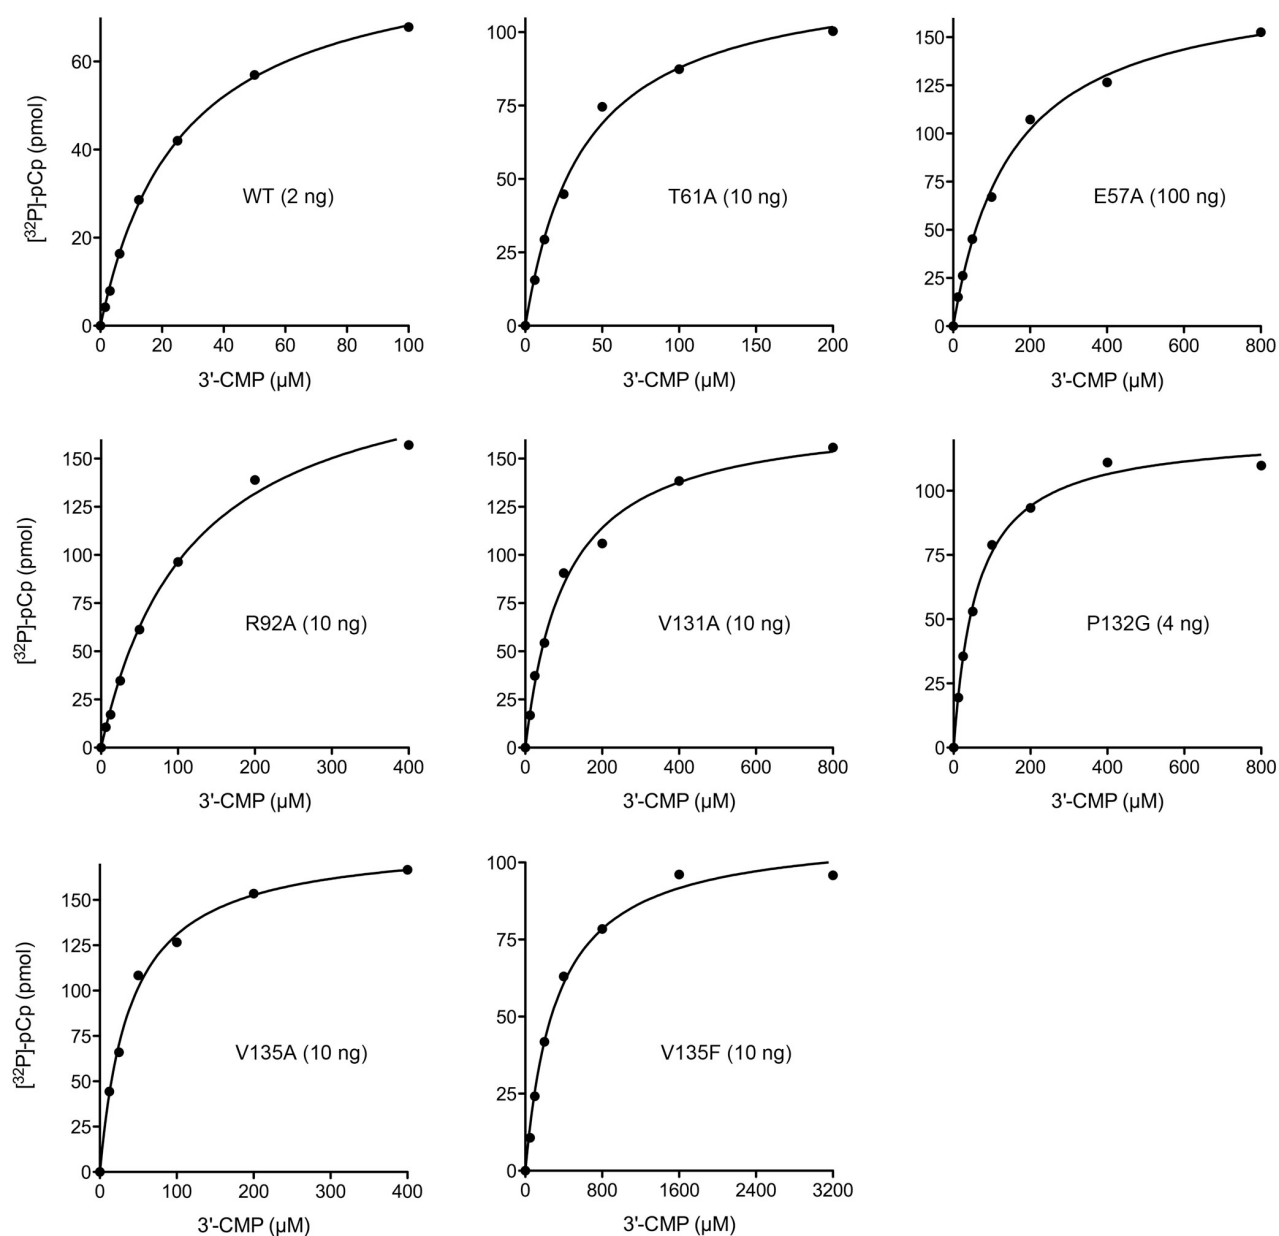

Figure S1. Dependence of kinase activity on the concentration of the 3'-CMP phosphate acceptor. Kinase assays were performed as described in Table I. The extents of  $[\alpha\text{-}^{32}\text{P}]\text{pCp}$  product formation by wild-type and mutant Pnkp proteins are plotted as a function of 3'-CMP concentration. The curves represent nonlinear regression fits of the data to the Michaelis-Menten equation. The amount of input Pnkp protein is specified in each plot.
